# Supplementary material for: Oxidative coupling of methane over sodium zirconate catalyst
Source: Royal Society of Chemistry journal article supplement (doi:10.1039/d1cy00741f), 2021-01-01
Supplement: d1cy00741f1.pdf [file d1cy00741f1.pdf]

Electronic Supplementary Information

## **Oxidative coupling of methane over sodium zirconate catalyst**

Bhavin Siritanaratkul,<sup>a</sup> Sean-Thomas B. Lundin,<sup>a</sup> and Kazuhiro Takanabe<sup>a,b</sup>

a. Department of Chemical System Engineering, University of Tokyo, 7-3-1 Hongo, Bunkyo-ku, 113-8656, Tokyo, Japan

b. PRESTO, Japan Science and Technology Agency (JST), 4-1-8 Honcho, Kawaguchi, Saitama 332-0012, Japan

## Simplified kinetic model and parameter fitting

The kinetic model and rate equations are shown in Scheme S1. As it was demonstrated that the addition of CO<sub>2</sub> decreased the CH<sub>4</sub> consumption rate, we assumed that CO<sub>2</sub> competes with hydrocarbon species for active sites, thus the CO<sub>2</sub> adsorption term was included in all steps. In some simplified reaction networks, CO and CO<sub>2</sub> are lumped into one pseudocomponent CO<sub>x</sub>, but for a more accurate description of O<sub>2</sub> consumption, it was necessary to explicitly treat the oxidation of CO to CO<sub>2</sub>, especially in the case of Na<sub>2</sub>ZrO<sub>3</sub> which has a known activity for CO oxidation. The O<sub>2</sub> reaction orders of the primary reactions (r<sub>1</sub>, r<sub>2</sub>, and r<sub>3</sub>) were considered as independent parameters, but to limit the degree of freedom in the model, the rates of secondary reactions (r<sub>4</sub>, r<sub>5</sub>, r<sub>6</sub>, and r<sub>7</sub>) were assumed to follow the kinetics of dissociatively adsorbed O<sub>2</sub> (i.e. to vary with O<sub>2</sub> to 0.5 order). To allow for fitting to experimental data from different temperatures, each rate constant was assumed to have an Arrhenius-type temperature dependence ( $k = A \exp(-E_a/RT)$ , where A is the pre-exponential factor and E<sub>a</sub> is the apparent activation energy). The adsorption equilibrium constant of CO<sub>2</sub> (K<sub>CO<sub>2</sub></sub>) was also considered to vary with temperature:  $K = K_{\infty} \exp(-\Delta H/RT)$ , where K<sub>∞</sub> is the equilibrium constant in the high-temperature limit and ΔH is the enthalpy of CO<sub>2</sub> adsorption, assumed to be constant over the experimental temperature range of 700 – 800 °C.

In preliminary model fitting, the adsorption term for CH<sub>4</sub> was also included, but the obtained value was close to zero, indicating that it was negligible. As the experimental selectivity of C<sub>2</sub>H<sub>2</sub> was <0.2 % in all runs, C<sub>2</sub>H<sub>2</sub> was not included in the kinetic modelling. C<sub>3</sub> and C<sub>4</sub> species were <3 %, and these were bundled with C<sub>2</sub>H<sub>4</sub> selectivity for modelling purposes. Additional reaction pathways were also considered (the nonoxidative dehydrogenation of C<sub>2</sub>H<sub>6</sub>, the oxidation of C<sub>2</sub>H<sub>6</sub> and C<sub>2</sub>H<sub>4</sub> to CO, the backwards reaction of CO<sub>2</sub> to CO) but their contributions were negligible under the selected conditions.

Figure S1 demonstrates the fit at 750 °C between the model and the experimental product distributions, CH<sub>4</sub> conversion, and C<sub>2</sub> yield, under various contact times (defined as the weight of the catalyst divided by the total flow rate, with the

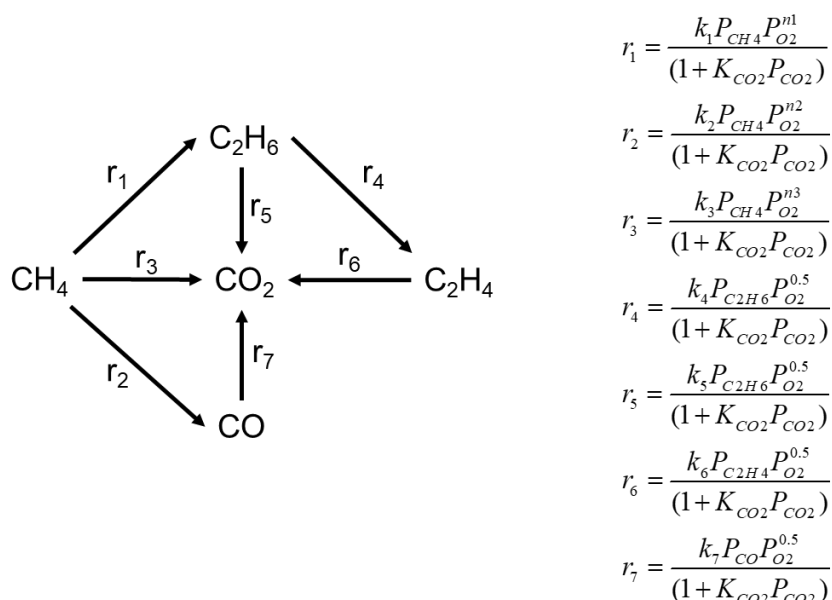

**Scheme S1.** Simplified reaction scheme and rate equations for OCM.

dimensions of g<sub>cat</sub> s mL<sup>-1</sup>). These results show that the simplified reaction network, with 19 degrees of freedom (7 rate constants, 7 apparent activation energies, 3 O<sub>2</sub> reaction orders, the adsorption equilibrium constant of CO<sub>2</sub>, and the enthalpy of adsorption of CO<sub>2</sub>), fit well with the experimental dataset across a wide range of conditions. The average error of a product partial pressure was 12.1 % (calculated from averaging the percentage differences between experimental and calculated C<sub>2</sub>H<sub>6</sub>, C<sub>2</sub>H<sub>4</sub>, CO, and CO<sub>2</sub> pressures at each of the 150 datapoints).

The fitted parameters are shown in Table S1. The fitted O<sub>2</sub> reaction orders for the CO and CO<sub>2</sub> forming reactions were higher than 1, which is higher than that of the C<sub>2</sub>H<sub>6</sub> forming reaction (r<sub>1</sub>), indicating that the primary C<sub>2</sub> selectivity is strongly dependent on the concentration of O<sub>2</sub>.

**Table S1.** Fitted kinetic parameters of Na<sub>2</sub>ZrO<sub>3</sub>. n is the total reaction order in the reaction steps 1-3. \* denotes parameters that were kept constant.

| Step number | O <sub>2</sub> reaction order | Pre-exponential factor A<br>(s <sup>-1</sup> kPa <sup>-n</sup> ) | Apparent activation energy E <sub>a</sub><br>(kJ mol <sup>-1</sup> ) | rate constant k at 750 °C (s <sup>-1</sup> kPa <sup>-n</sup> ) |
|-------------|-------------------------------|------------------------------------------------------------------|----------------------------------------------------------------------|----------------------------------------------------------------|
| 1           | 0.31                          | 9.10E+08                                                         | 185                                                                  | 0.31                                                           |
| 2           | 1.32                          | 2.15E+00                                                         | 32                                                                   | 0.053                                                          |
| 3           | 1.48                          | 4.30E+00                                                         | 33                                                                   | 0.092                                                          |
| 4           | 0.5*                          | 1.07E+08                                                         | 144                                                                  | 4.8                                                            |
| 5           | 0.5*                          | 2.23E+06                                                         | 110                                                                  | 5.5                                                            |
| 6           | 0.5*                          | 2.40E+05                                                         | 100                                                                  | 1.8                                                            |
| 7           | 0.5*                          | 2.64E+06                                                         | 126                                                                  | 1.0                                                            |

  

| CO <sub>2</sub> adsorption | High-temperature limit adsorption equilibrium constant K <sub>∞</sub> (kPa <sup>-1</sup> ) | Enthalpy of adsorption ΔH<br>(kJ mol <sup>-1</sup> ) | adsorption equilibrium constant K at 750 °C<br>(kPa <sup>-1</sup> ) |    |
|----------------------------|--------------------------------------------------------------------------------------------|------------------------------------------------------|---------------------------------------------------------------------|----|
| -                          | -                                                                                          | 5.77E-11                                             | -228                                                                | 24 |

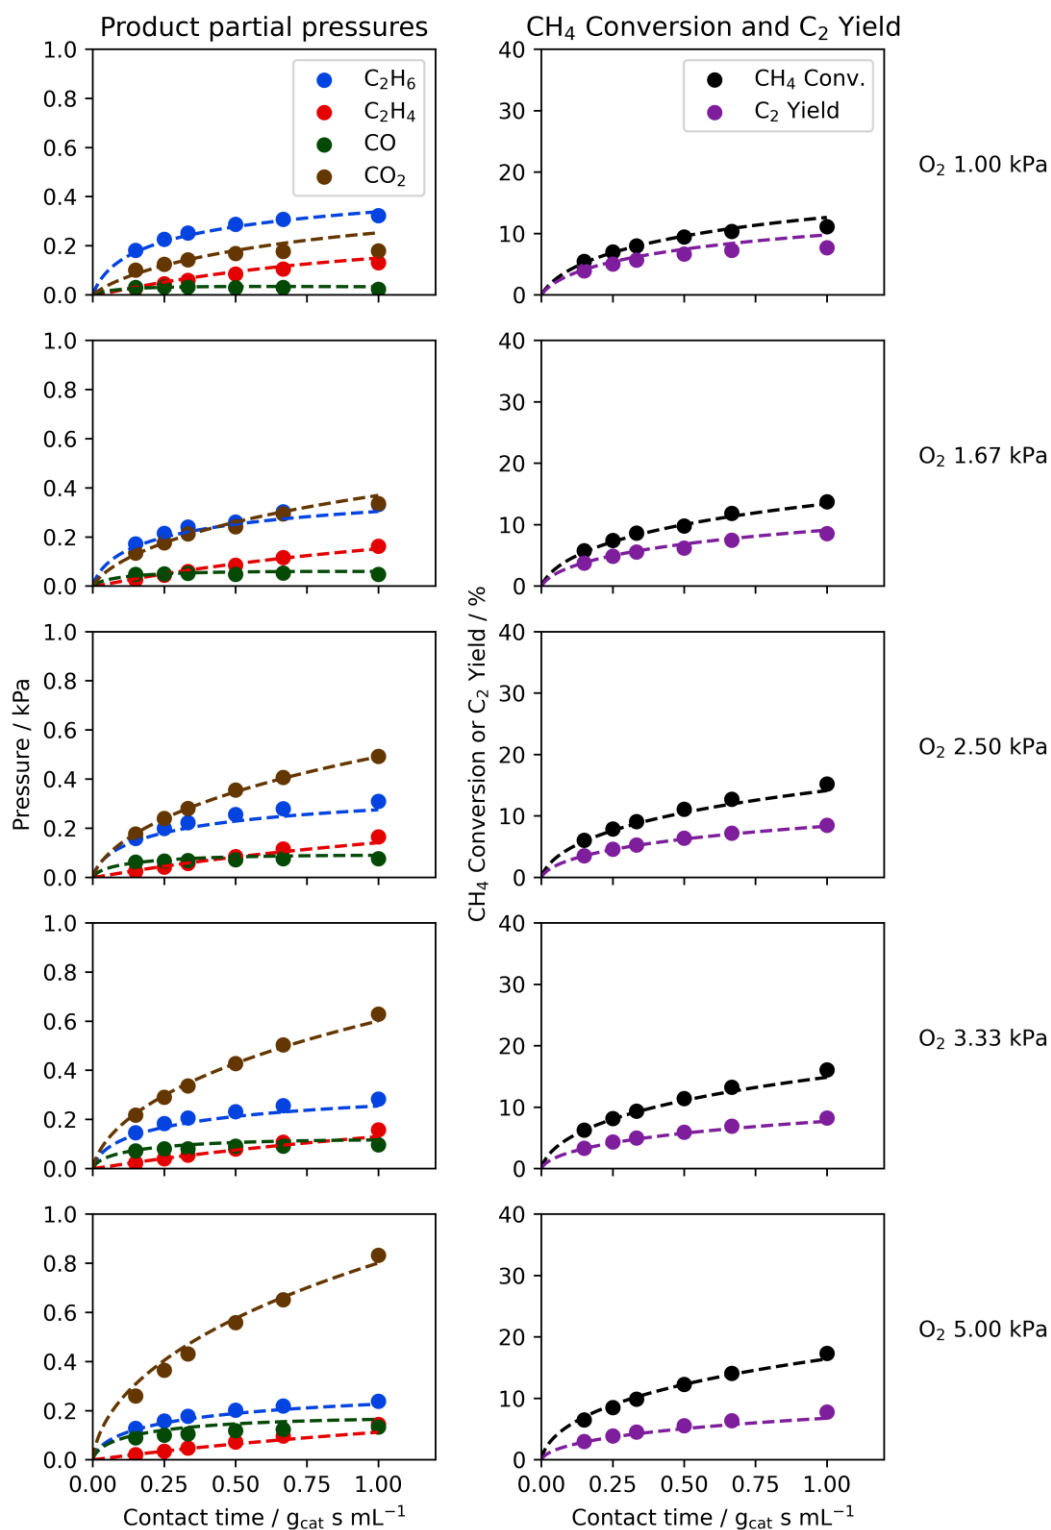

**Figure S1.** Experimental (points) and fitted model (dashed lines) product partial pressures, CH<sub>4</sub> conversion, and C<sub>2</sub> yield at various contact times. C<sub>2</sub>H<sub>6</sub>: blue, C<sub>2</sub>H<sub>4</sub>: red, CO: green, CO<sub>2</sub>: brown, CH<sub>4</sub> conversion: black, C<sub>2</sub> yield: purple. Reaction conditions: catalyst 0.5 g, 750 °C, CH<sub>4</sub> 10 kPa, O<sub>2</sub> 1.0 – 5.0 kPa, total pressure 101 kPa (Ar balance), total flow rate 30 – 200 mL min<sup>-1</sup>.

## OCM performance of ZrO<sub>2</sub>

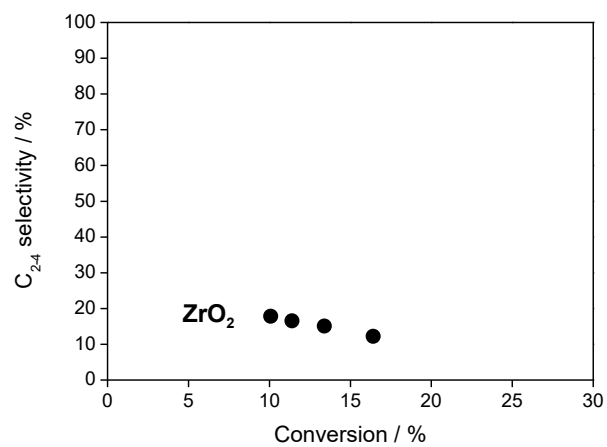

**Figure S2.** The OCM performance of ZrO<sub>2</sub>. Reaction conditions: catalyst 0.2 g, 800 °C, CH<sub>4</sub> 10 kPa, O<sub>2</sub> 1.7 kPa, total pressure 101 kPa (Ar balance), total gas flow 30 - 150 mL min<sup>-1</sup>.
